# Supplementary material
Source: PubMed Central journal article supplement (PMC3693737)
Supplement: NIHMS444213-supplement-2.pdf [file NIHMS444213-supplement-2.pdf]

## **Supplementary Materials**

### **Engineering the type III secretion system in non-replicating bacterial minicells for antigen delivery**

Heather A. Carleton, María Lara-Tejero, Xiaoyun Liu, and Jorge E. Galán

#### **This file contains:**

Supplementary Figures S1 to S6

Supplementary Tables S1 to S5

Supplementary Methods

Supplementary References

**Supplementary Figure S1.** Diagram of the minicell isolation protocol

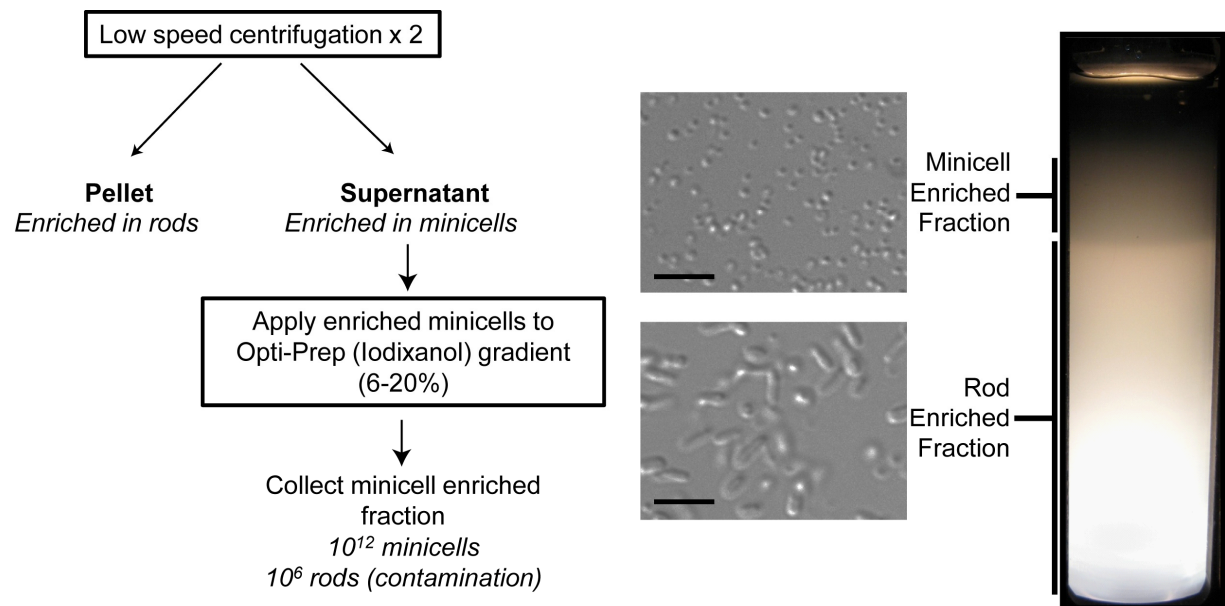

DIC images obtained from the indicated fractions of a 5-20% iodixanol gradient are shown.  
Scale bar: 2  $\mu$ m.

**Supplementary Figure S2.** Comparison of the levels of selected SPI-1 T3SS-associated proteins in minicells and bacterial rods from strains with or without overexpression of the SPI-1 T3SS transcriptional regulator HilA.

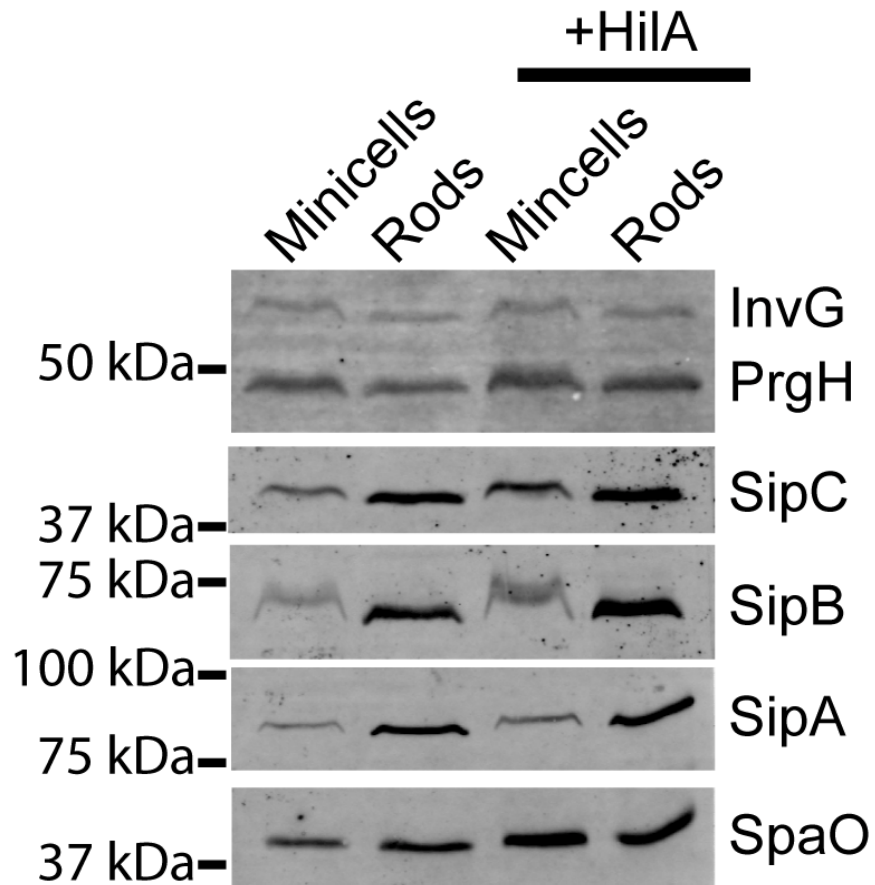

Equal amount of protein (standardized based on the values shown in Supplementary Fig. S3a) from minicell or bacterial rod lysates were analyzed by Western blot with antibodies directed to the indicated proteins.

**Supplementary Figure S3.** Protein content used to standardize loading in the Western blot analyzes of the different samples utilized in this study.

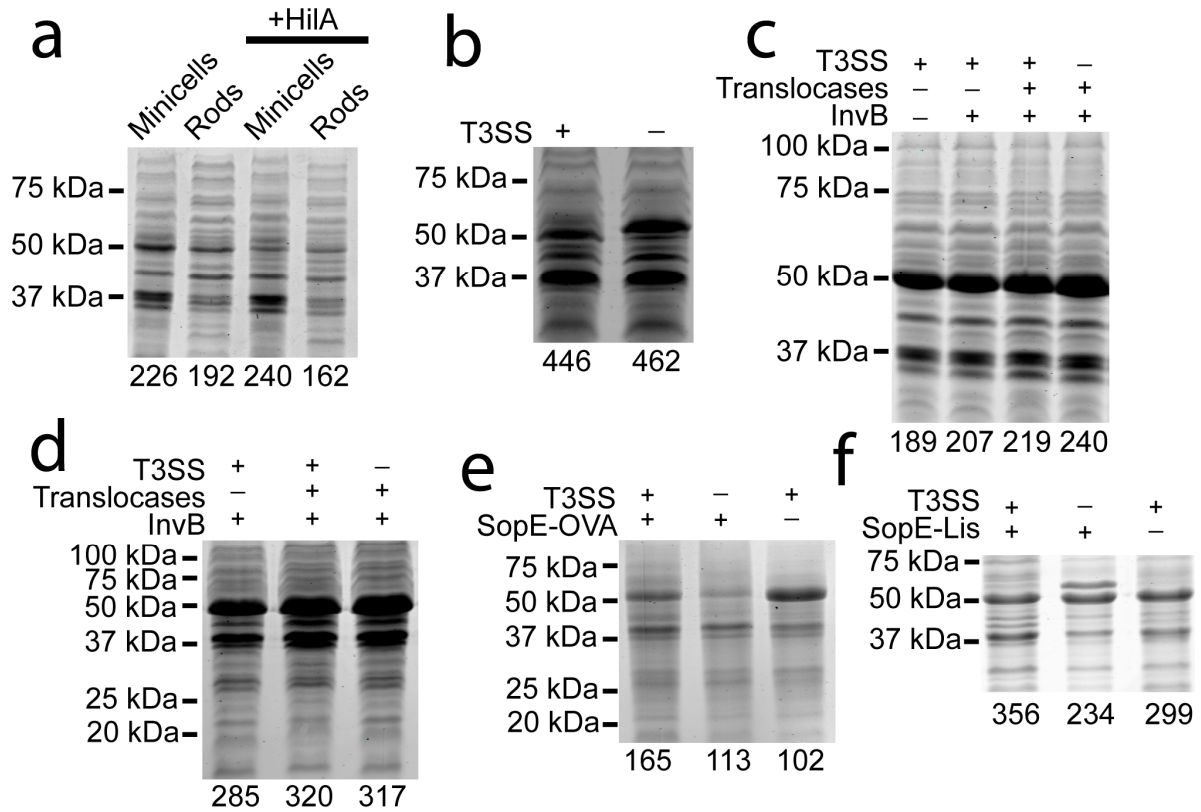

Lysates from the indicated samples were separated by SDS-PAGE, stained with Coomassie blue, and the gels scanned on an Odyssey infrared imaging system (LI-COR Biosciences). Values below each lane correspond to the integrated intensity of the entire lane. Samples in panel (a) correspond to experiments shown in **Fig. 1c**, samples in panel (b) corresponds to experiments shown in **Fig. 2c**, samples in panel (c) correspond to experiments shown in **Fig. 3b**, samples in panel (d) correspond to experiments in **Fig. 3d**, samples in panel (e) correspond to experiments in **Fig. 4a**, and samples in panel (f) correspond to experiments shown in **Fig. 4d**.

**Supplementary Figure S4.** Comparison of lysates prepared from minicells and rods at the indicated concentrations.

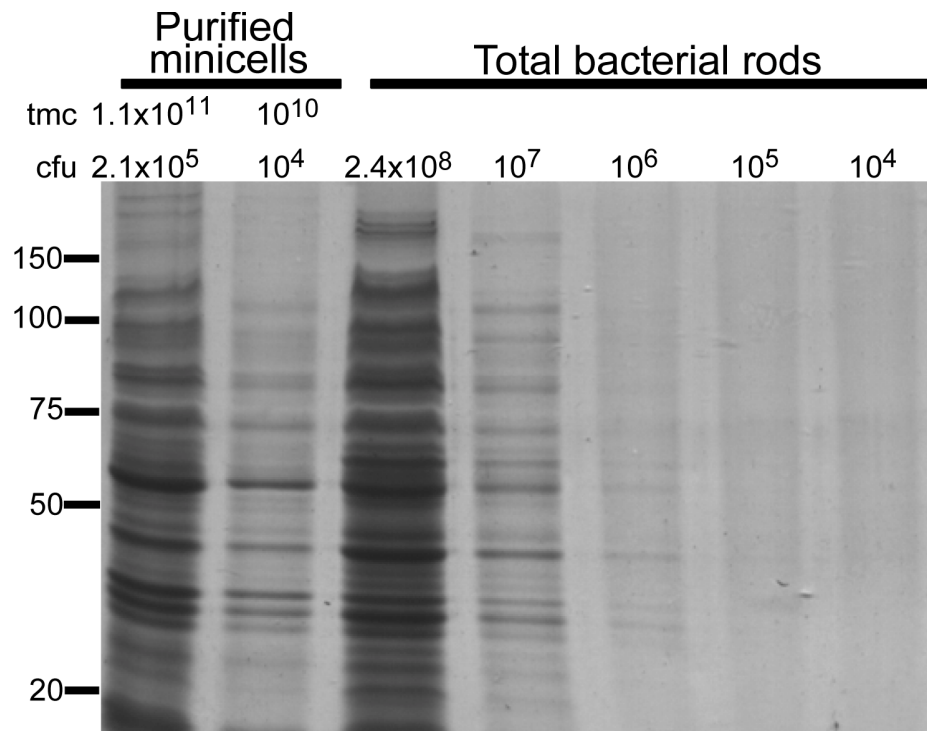

The number of minicells is indicated as total minicell count (tmc) and the number of rods is indicated as colony forming units (cfu). These results indicate that the potential contribution of rod contaminants in the minicell samples to the total amount of protein is negligible.

**Supplementary Figure S5.** Relative contribution of rod-derived material to the purified minicell preparation

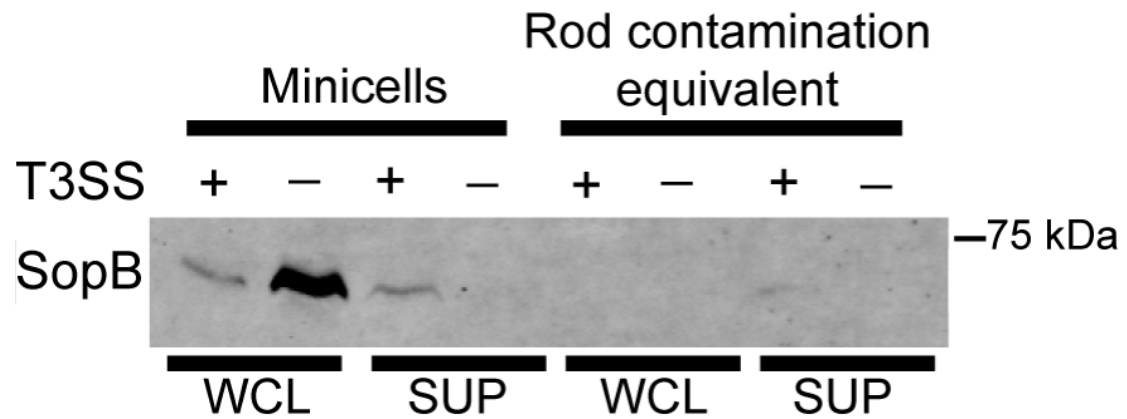

Comparison of the levels of SopB in whole cell lysates (wcl) and supernatants (sup) obtained from minicell preparations and from an equivalent number of rods present as contaminants in the minicell preparation. These results indicate that the rod contamination does not significantly contribute to the signal observed in the minicell preparation.

**Supplementary Figure S6.** Bacterial rod cells in equivalent numbers to those present in minicell preparations used in the antigen presentation assay did not elicit a response.

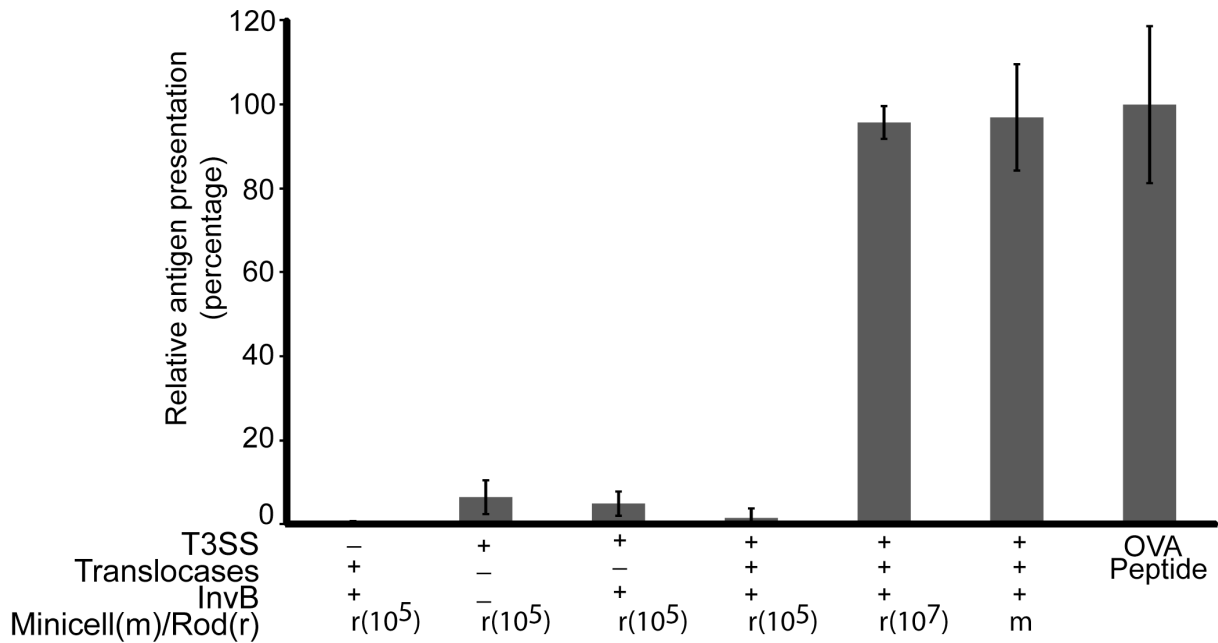

RMA cells (C57BL/6 mouse hybridomas) were pulsed for 3 hours with equivalent number of wild type or T3SS-defective ( $\Delta invA$ ) *S. Typhimurium* cells (i. e.  $10^5$ ) to those present in the minicell preparation. In addition, RMA cells were pulsed with the minimal number of bacterial rods ( $10^7$ ) necessary to stimulate a response in this assay as well as with a minicell preparation ( $10^{11}$ ) for comparison. After pulsing, RMA cells were fixed, and used as APCs in a B3Z T-cell activation assay as described in experimental procedures. Values represent the levels of antigen presentation based on the  $\beta$ -galactosidase activity detected in the B3Z-T cell hybridoma reporter and are normalized relative to the values of the OVA peptide positive control, which was considered 100 %. The values are the mean  $\pm$  standard deviation of three independent experiments.

**Supplementary Table S1.** Spectral counts obtained by LC-MS/MS analysis of T3SS-associated proteins in minicell and rod samples from *ΔminD S. Typhimurium*

| T3SS Protein | Spectral Counts                |      |       |                           |       |       | Relative Abundance (fold difference) <sup>1</sup> |                              |
|--------------|--------------------------------|------|-------|---------------------------|-------|-------|---------------------------------------------------|------------------------------|
|              | Minicell Biological Replicates |      |       | Rod Biological Replicates |       |       | minicells vs rods                                 | Adjusted values <sup>2</sup> |
|              | 1                              | 2    | 3     | 1                         | 2     | 3     |                                                   |                              |
| AvrA         | 0.5                            | 0.6  | 1.3   | 0.6                       | 1.0   | 8.1   | -1.9                                              | -0.1                         |
| HilA         | 9.3                            | 7.0  | 2.7   | 21.1                      | 23.3  | 29.7  | -3.6                                              | -1.8                         |
| HilD         | 0.5                            | 1.2  | 0.7   | 0.6                       | 1.0   | 4.2   | -1.4                                              | 0.4                          |
| IacP         | 0.7                            | 1.0  | 0.5   | 4.3                       | 1.5   | 2.5   | -3.0                                              | -1.3                         |
| InvA         | 2.3                            | 2.3  | 1.8   | 2.0                       | 1.3   | 4.6   | 1.1                                               | -0.9                         |
| InvB         | 38.0                           | 21.9 | 27.0  | 69.1                      | 57.0  | 43.5  | -1.9                                              | -0.1                         |
| InvC         | 7.7                            | 6.3  | 4.7   | 7.5                       | 9.3   | 16.6  | -1.5                                              | -3.5                         |
| InvE         | 0.7                            | 0.8  | 0.7   | 0.6                       | 0.7   | 4.2   | -1.2                                              | 0.6                          |
| InvF         | 0.5                            | 0.6  | 0.5   | 3.5                       | 2.0   | 3.5   | -5.2                                              | -3.4                         |
| InvG         | 48.0                           | 34.4 | 40.3  | 52.0                      | 65.3  | 69.0  | -1.5                                              | -3.5                         |
| InvH         | 5.0                            | 3.1  | 9.0   | 9.8                       | 6.0   | 7.1   | -1.3                                              | -3.3                         |
| InvJ         | 2.0                            | 1.6  | 2.0   | 11.9                      | 5.3   | 20.5  | -5.4                                              | -3.6                         |
| OrgA         | 3.0                            | 0.8  | 2.3   | 7.8                       | 4.0   | 2.8   | -2.1                                              | -0.3                         |
| OrgB         | 16.3                           | 8.2  | 14.7  | 19.7                      | 19.0  | 20.2  | -1.5                                              | 0.3                          |
| PrgH         | 22.7                           | 19.9 | 17.0  | 35.9                      | 28.7  | 32.2  | -1.6                                              | -3.6                         |
| PrgI         | 11.3                           | 9.8  | 7.0   | 9.5                       | 6.3   | 9.9   | 1.1                                               | -0.9                         |
| PrgJ         | 1.7                            | 1.6  | 1.3   | 3.8                       | 1.5   | 1.8   | -1.3                                              | -3.3                         |
| PrgK         | 27.0                           | 23.4 | 25.0  | 37.3                      | 24.0  | 21.6  | -1.0                                              | -3.1                         |
| SicA         | 38.0                           | 26.2 | 28.7  | 111.6                     | 89.7  | 66.2  | -2.8                                              | -1.0                         |
| SicP         | 0.5                            | 0.6  | 1.2   | 9.0                       | 7.0   | 2.1   | -4.4                                              | -2.6                         |
| SigE         | 18.0                           | 16.8 | 16.7  | 83.3                      | 47.0  | 28.7  | -2.6                                              | -0.8                         |
| SipA         | 21.3                           | 11.7 | 49.7  | 162.5                     | 118.3 | 173.0 | -5.8                                              | -4.0                         |
| SipB         | 151.7                          | 54.7 | 114.7 | 445.0                     | 395.7 | 273.5 | -3.3                                              | -1.5                         |
| SipC         | 66.0                           | 28.5 | 93.0  | 105.0                     | 92.7  | 168.1 | -2.0                                              | -0.2                         |
| SipD         | 7.0                            | 3.5  | 13.0  | 61.0                      | 46.7  | 64.8  | -7.7                                              | -5.9                         |
| SlrP         | 2.7                            | 0.6  | 1.0   | 20.0                      | 8.0   | 10.3  | -9.9                                              | -8.1                         |
| SopA         | 4.0                            | 6.3  | 8.3   | 26.0                      | 10.0  | 21.9  | -2.6                                              | -0.8                         |
| SopB         | 75.3                           | 44.2 | 93.3  | 306.5                     | 214.7 | 170.5 | -3.0                                              | -1.2                         |
| SopD         | 0.5                            | 0.6  | 1.7   | 17.3                      | 2.7   | 6.0   | -5.7                                              | -3.9                         |
| SopE         | 31.0                           | 13.7 | 19.7  | 79.2                      | 78.0  | 26.9  | -2.3                                              | -0.5                         |
| SopE2        | 2.7                            | 1.2  | 0.5   | 22.8                      | 22.0  | 2.8   | -8.7                                              | -6.9                         |
| SpaO         | 11.7                           | 10.9 | 9.0   | 11.9                      | 14.3  | 12.4  | -1.2                                              | 0.6                          |
| SpaS         | 5.7                            | 3.5  | 3.7   | 4.9                       | 6.7   | 5.3   | -1.3                                              | -3.3                         |
| SptP         | 6.3                            | 4.7  | 6.7   | 103.5                     | 47.0  | 53.1  | -10.5                                             | -8.7                         |

<sup>1</sup>: Relative abundance was determined by comparing the average spectral counts of rod and minicell samples

<sup>2</sup>: Values have been adjusted to account for the different ratio of membrane vs cytoplasmic content in the minicells (see Methods)

**Supplementary Table S2.** Spectral counts obtained by LC-MS/MS analysis of T3SS-associated proteins in minicell and rod samples from *ΔminD S. Typhimurium* overexpressing the T3SS positive transcription regulator HilA.

| Protein | Spectral Counts |       |                      |                 | Relative Abundance<br>(Fold Difference) <sup>1</sup> |                                     |                                                |
|---------|-----------------|-------|----------------------|-----------------|------------------------------------------------------|-------------------------------------|------------------------------------------------|
|         | Minicells       | Rods  | Minicells<br>(+HilA) | Rods<br>(+HilA) | Minicells<br>(+HilA)<br>versus<br>minicells          | Minicells<br>(+HilA)<br>versus rods | Minicells<br>(+HilA)<br>versus rods<br>(+HilA) |
| AvrA    | 0.9             | 3.2   | 0.7                  | 2.2             | -1.4                                                 | -4.9                                | -3.3                                           |
| HilA    | 1.3             | 25.7  | 86.1                 | 175.2           | 67.5                                                 | 3.4                                 | -2.0                                           |
| HilD    | 0.5             | 4.0   | 0.7                  | 3.2             | 1.2                                                  | -6.1                                | -4.9                                           |
| IacP    | 0.5             | 0.7   | 0.7                  | 2.2             | 1.2                                                  | -1.0                                | -3.3                                           |
| InvA    | 4.4             | 6.0   | 52.2                 | 68.8            | 12.0                                                 | 8.7                                 | -1.3                                           |
| InvB    | 24.0            | 52.7  | 65.3                 | 77.4            | 2.7                                                  | -0.8                                | -1.2                                           |
| InvC    | 3.3             | 11.0  | 45.7                 | 65.6            | 14.0                                                 | 4.2                                 | -1.4                                           |
| InvE    | 1.1             | 0.7   | 2.6                  | 3.2             | 2.4                                                  | 3.9                                 | -1.2                                           |
| InvF    | 0.5             | 1.5   | 5.2                  | 2.2             | 9.6                                                  | 3.5                                 | 2.4                                            |
| InvG    | 10.2            | 20.7  | 30.0                 | 46.2            | 3.0                                                  | 1.5                                 | -1.5                                           |
| InvH    | 9.8             | 10.0  | 20.9                 | 21.5            | 2.1                                                  | 2.1                                 | -1.0                                           |
| InvJ    | 3.6             | 32.7  | 1.3                  | 18.3            | -2.8                                                 | -25.0                               | -14.0                                          |
| OrgA    | 2.9             | 6.7   | 18.3                 | 21.5            | 6.3                                                  | 2.7                                 | -1.2                                           |
| OrgB    | 13.1            | 13.0  | 57.4                 | 25.8            | 4.4                                                  | 4.4                                 | 2.2                                            |
| PrgH    | 19.3            | 26.3  | 97.9                 | 108.6           | 5.1                                                  | 3.7                                 | -1.1                                           |
| PrgI    | 0.5             | 0.5   | 0.7                  | 10.8            | 1.2                                                  | 1.3                                 | -16.5                                          |
| PrgJ    | 0.5             | 0.5   | 2.6                  | 4.3             | 4.8                                                  | 5.2                                 | -1.6                                           |
| PrgK    | 18.9            | 17.3  | 113.5                | 86.0            | 6.0                                                  | 6.6                                 | 1.3                                            |
| SicA    | 29.1            | 53.3  | 57.4                 | 92.5            | 2.0                                                  | -0.9                                | -1.6                                           |
| SicP    | 0.5             | 3.7   | 7.8                  | 14.0            | 14.4                                                 | 2.1                                 | -1.8                                           |
| SigE    | 18.2            | 23.3  | 41.8                 | 57.0            | 2.3                                                  | 1.8                                 | -1.4                                           |
| SipA    | 29.4            | 165.3 | 61.3                 | 220.4           | 2.1                                                  | -2.7                                | -3.6                                           |
| SipB    | 109.7           | 253.3 | 693.0                | 478.4           | 6.3                                                  | 2.7                                 | 1.4                                            |
| SipC    | 83.9            | 150.7 | 390.2                | 250.5           | 4.6                                                  | 2.6                                 | 1.6                                            |
| SipD    | 10.9            | 71.3  | 67.9                 | 103.2           | 6.2                                                  | -1.1                                | -1.5                                           |
| SlrP    | 0.9             | 6.3   | 2.6                  | 33.3            | 2.9                                                  | -2.4                                | -12.8                                          |
| SopA    | 8.0             | 23.3  | 47.0                 | 91.4            | 5.9                                                  | 2.0                                 | -1.9                                           |
| SopB    | 70.9            | 152.7 | 197.1                | 369.8           | 2.8                                                  | -0.8                                | -1.9                                           |
| SopD    | 0.5             | 4.3   | 23.5                 | 64.5            | 43.1                                                 | 5.4                                 | -2.7                                           |
| SopE    | 18.9            | 18.7  | 63.9                 | 51.6            | 3.4                                                  | 3.4                                 | 1.2                                            |
| SopE2   | 0.5             | 3.7   | 7.8                  | 22.6            | 14.4                                                 | 2.1                                 | -2.9                                           |
| SpaO    | 10.5            | 14.7  | 35.2                 | 29.0            | 3.3                                                  | 2.4                                 | 1.2                                            |
| SpaP    | 0.9             | 1.7   | 28.7                 | 6.5             | 31.6                                                 | 17.2                                | 4.5                                            |
| SpaS    | 5.1             | 4.0   | 2.6                  | 5.4             | -1.9                                                 | -1.5                                | -2.1                                           |
| SptP    | 2.5             | 30.3  | 5.2                  | 179.5           | 2.1                                                  | 0.2                                 | -34.4                                          |

<sup>1</sup>: Relative abundance was determined by comparing the average spectral counts of rod and minicell samples

**Supplementary Table S3.** Bacterial strains used in this study:

| Strain                | Relevant genotype                                   | References or sources                                 |
|-----------------------|-----------------------------------------------------|-------------------------------------------------------|
| <i>S. Typhimurium</i> |                                                     |                                                       |
| SL1344                | wild-type <i>rpsL hisG</i>                          | <sup>47</sup>                                         |
| SB136                 | <i>invA::aphT</i>                                   | <sup>48</sup>                                         |
| SB1780                | <i>minD::cat</i>                                    | (this study)                                          |
| SB1781                | <i>minD::cat invA::aphT</i>                         | P22HTint [SB1780] =>SB136 (this study)                |
| SB1771                | <i>minD::cat sipD3xF</i>                            | P22HTint [SB1780] =>SB1630 <sup>31</sup> (this study) |
| SB1774                | <i>invA::aphT minD::cat sipD3xF</i>                 | P22HTint [SB136] => SB1771 (this study)               |
| SB2105                | <i>sipAM45 3xFspaO</i>                              | (this study)                                          |
| SB1790                | <i>minD::cat sipAM45 3xFspaO</i>                    | P22HTint [SB1780] =>SB2105(this study)                |
| SB1400                | $\Delta asd$                                        | <sup>49</sup>                                         |
| SB1777                | <i>minD::cat <math>\Delta asd</math></i>            | P22HTint [SB1780] =>SB1400(this study)                |
| SB1788                | <i>minD::cat invA::aphT <math>\Delta asd</math></i> | P22HTint [SB136] =>SB1777 (this study)                |

**Supplementary Table S4.** Plasmids used in this study:

| Plasmid Name | Relevant information                                           | References or sources |
|--------------|----------------------------------------------------------------|-----------------------|
| pSB3504      | P <sup>rhaBAD</sup> , Spectinomycin <sup>R</sup> , <i>hlaA</i> | 50                    |
| pSB2811      | pBAD24- <i>sopB3xF-sigE</i>                                    | 51                    |
| pSB3506      | pBAD24- <i>sopE-OVA3xF</i>                                     | (this study)          |
| pSB3507      | pBAD24- <i>sopE-OVA3xF invB</i>                                | (this study)          |
| pSB3508      | pBAD24- <i>sopE-OVA-3xF invB invE sicA sipB sipC sipD</i>      | (this study)          |
| pSB3510      | pBAD24- <i>sopE-m45-LLO-p60 invB invE sicA sipB sipC sipD</i>  | (this study)          |

**Supplementary Table S5.** Antibodies used in this study

| <b>Antibody</b>         | <b>Source</b>    | <b>Catalog #</b> | <b>Dilution</b> |
|-------------------------|------------------|------------------|-----------------|
| Anti-Flag (M2)          | Sigma            | F3165            | 1:10,000        |
| Anti-M45                | Galan laboratory |                  | 1:500           |
| Anti-SipB               | Galan laboratory |                  | 1:2,000         |
| Anti-SipC               | Galan laboratory |                  | 1:500           |
| Anti-Needle Complex     | Galan laboratory |                  | 1:5,000         |
| Anti-mouse Dylight 680  | Pierce           | PI35518          | 1:10,000        |
| Anti-rabbit Dylight 800 | Pierce           | PI35571          | 1:10,000        |
| Anti-mouse HRP          | Sigma            | A4416            | 1:10,000        |

## **Supplementary Methods:**

### **Mass spectrometry data analysis**

All raw data from the MS/MS scans was processed and searched against the *Salmonella* database with MASCOT (Matrix Science Ltd. London, UK). The peptide and protein assignments from MASCOT were filtered to retain only those identifications with MASCOT scores above extensive homology. Relative protein abundance was determined by the spectral counting method<sup>44</sup>. Experiments were carried out in triplicate with three biological replicates for each experimental condition unless noted otherwise. Data between technical replicates in a single biological sample were normalized and spectral counts for each technical replicate in individual biological replicates were averaged. All biological replicates with a spectral count of less than one were arbitrarily assigned a value of 0.5 to reflect the limits of detection. Spectral counts were logarithmically transformed to obtain a binomial distribution then statistically evaluated using a paired, two-tailed *t*-test to determine significant differences between protein relative abundance<sup>45</sup> in minicell versus bacterial rod samples. Due to their different ratio of membrane vs. cytosol, minicells were found to be relatively enriched in membrane proteins (median 2.0 fold) and depleted in cytoplasmic proteins (median -1.8 fold) [note: prediction of protein subcellular localization was carried out with PSORT (<http://www.psorth.org>)]. Therefore, the relative abundance of membrane and cytoplasmic proteins was corrected to reflect these differences. The correction factor introduced was -2.0 for predicted membrane proteins and +1.8 for predicted cytoplasmic proteins. For comparison of abundance of T3SS proteins in minicells and rods obtained from a parental strain overexpressing *hilA*, all samples were obtained from cultures grown in the presence of 0.02% rhamnose.

### **Antigen presentation assay**

RMA cells (C57BL/6 mouse hybridomas) or bone marrow-derived dendritic cells (BMDCs) obtained from C57BL/6 mice were used as antigen-presenting cells after incubation with minicells isolated from various parental *S. Typhimurium* strains. Mouse BMDC were prepared as described previously<sup>46</sup>. Approximately  $10^{11}$  minicells were used to deliver antigen to approximately  $10^7$  RMA cells in one well of a 6 well dish in 2 ml of Dulbecco's modified Eagle's medium (DMEM) at 37°C for 3 hours. Alternatively,  $10^{10}$  minicells were incubated with  $10^6$  BMDCs per well in a 24 well plate. For these experiments, the  $\Delta asd$  mutation (21) was introduced into all the *S. Typhimurium* minicell-generating strains. The  $\Delta asd$  mutation renders *S. Typhimurium* auxotrophic for L-diaminopimelic acid (DAP), which is absent in host tissues. Consequently, any small number of bacterial rods remaining in the minicell preparation will undergo rapid "DAP-less" death shortly after infection and will not contribute to the immune response. In addition to DMEM the cells were also incubated in the presence of 0.2% arabinose to induce expression from plasmids contained within the minicell. After incubation, the cells were washed three times in PBS and then fixed in 1% paraformaldehyde either for 20 min at room temperature or overnight at 4°C. After fixation of the antigen presenting cells, the cells were washed and then plated at a concentration of  $2 \times 10^5$  in triplicate in 100  $\mu$ l DMEM cultures in a 96-well dish. To each well  $2 \times 10^5$  OVA-specific B3Z T-cell hybridoma cells were then added. This transgenic cell line expresses a T-cell receptor specific for the MHC class I immunodominant peptide of OVA, SIINFEKL. The activation of the TCR of the B3Z cells was determined by an NF-AT-dependent transcriptional reporter consisting of the IL-2 promoter

fused to LacZ<sup>35</sup>. After incubation for approximately 19 hours, the B3Z T cells were washed, lysed, and  $\beta$ -galactosidase production was measured using a chromogenic substrate, chlorophenolred- $\beta$ -D-galactopyranoside (CPRG, CALBIOCHEM). Addition of the OVA peptide SIINFELK (1 $\mu$ M, ABBIOTEC) served as a positive control and all results were normalized relative to the values obtained with the SIINFELK peptide.

### **Adoptive transfer immunization**

Spleens were removed from OT-1 (CD45.2/C57BL/6) mice, homogenized using a 1mm<sup>2</sup> mesh metal strainer, and red blood cells were lysed with a hypotonic buffer (0.15M NH<sub>4</sub>CL and 1mM NaHCO<sub>3</sub>, pH 7.4). A total of 1-2x10<sup>7</sup> splenocytes were then injected in the tail vein of C57BL/6 (CD45.1) mice and one day later, mice were immunized by intraperitoneal administration of 1-2 x10<sup>10</sup> minicells purified from different *S. Typhimurium* parental strains. Minicells were pulsed for 3 hours at 37°C in L broth containing 0.2% arabinose prior to immunization to allow SopE-OVA antigen expression. For these experiments, the  $\Delta asd$  mutation (21) was introduced into all the *S. Typhimurium* minicell-generating strains to avoid replication of the very small number of contaminating rod cells. Three weeks after the initial immunization, mice were boosted by i.p. administration of 1x10<sup>7</sup> plaque forming units (PFUs) of recombinant Vesicular stomatitis virus expressing OVA (VSV-OVA) (22) generously provided by Leo Lefrançois (University of Connecticut Health Center, Farmington, Conn.). Five days after boosting, immunized mice were sacrificed and the spleens were removed and splenocytes prepared as described above.

### **Supplementary References**

- 31     Lara-Tejero, M. & Galan, J. E. The Salmonella Typhimurium SPI-1 type III secretion translocases mediate intimate attachment to non-phagocytic cells. *Infect Immun* 77, 2635-2642. (2009).
- 35     Karttunen, J., Sanderson, S. & Shastri, N. Detection of rare antigen-presenting cells by the lacZ T-cell activation assay suggests an expression cloning strategy for T-cell antigens. *Proc Natl Acad Sci U S A.* 89, 6020-6024 (1992).
- 44     Liu, H., Sadygov, R. G. & Yates, J. R., 3rd. A model for random sampling and estimation of relative protein abundance in shotgun proteomics. *Anal Chem* 76, 4193-4201 (2004).
- 45     Gonzalez-Alba, J. M. *et al.* Molecular surveillance of HIV-1 in Madrid, Spain: a phylogeographic analysis. *J Virol* 85, 10755-10763, doi:10.1128/JVI.00454-11 (2011).
- 46     Salado, C. T. *et al.* Hemophagocytic lymphohistiocytosis in Crohn's disease associated with primary infection by Epstein-Barr virus. *Inflammatory bowel diseases* 17, E143-144, (2011).
- 47     Hoiseth, S. K. & Stocker, B. A. Aromatic-dependent *Salmonella typhimurium* are non-virulent and effective as live vaccines. *Nature* 291, 238-239 (1981).
- 48     Galán, J. E., Ginocchio, C. & Costeas, P. Molecular and functional characterization of the *Salmonella typhimurium* invasion gene *invA*: Homology of InvA to members of a new protein family. *J. Bacteriol.* 17, 4338-4349 (1992).
- 49     Galán, J. E., Nakayama, K. & Curtiss, R. d. Cloning and characterization of the *asd* gene of *Salmonella typhimurium*: use in stable maintenance of recombinant plasmids in *Salmonella* vaccine strains. *Gene* 94, 29-35 (1990).
- 50     Wagner, S. *et al.* Organization and coordinated assembly of the type III secretion export apparatus. *Proc Natl Acad Sci USA* 107, 17745-17750 (2010).
- 51     Patel, J. C. & Galan, J. E. Differential activation and function of Rho GTPases during Salmonella-host cell interactions. *J Cell Biol* 175, 453-463 (2006).
